# Supplementary material for: Genomics-informed isolation and characterization of a symbiotic Nanoarchaeota system from a terrestrial geothermal environment
Source: PubMed Central journal article supplement (PMC4935971; doi:10.1038/ncomms12115), 2016-07-05
Supplement: ncomms12115-s1.pdf [file ncomms12115-s1.pdf]

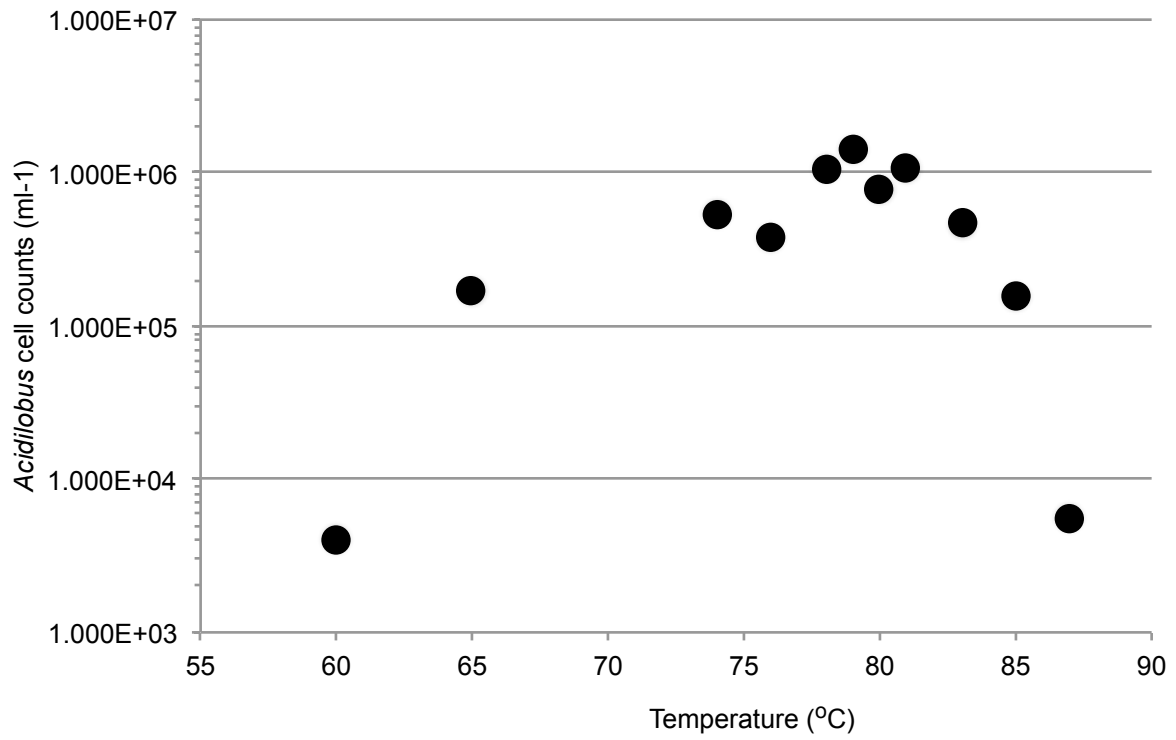

**Supplementary Figure 1.** Effect of temperature on *Acidilobus* sp.7A growth in co-culture with *N. acidilobi*, based on cell density measured after 3 days.

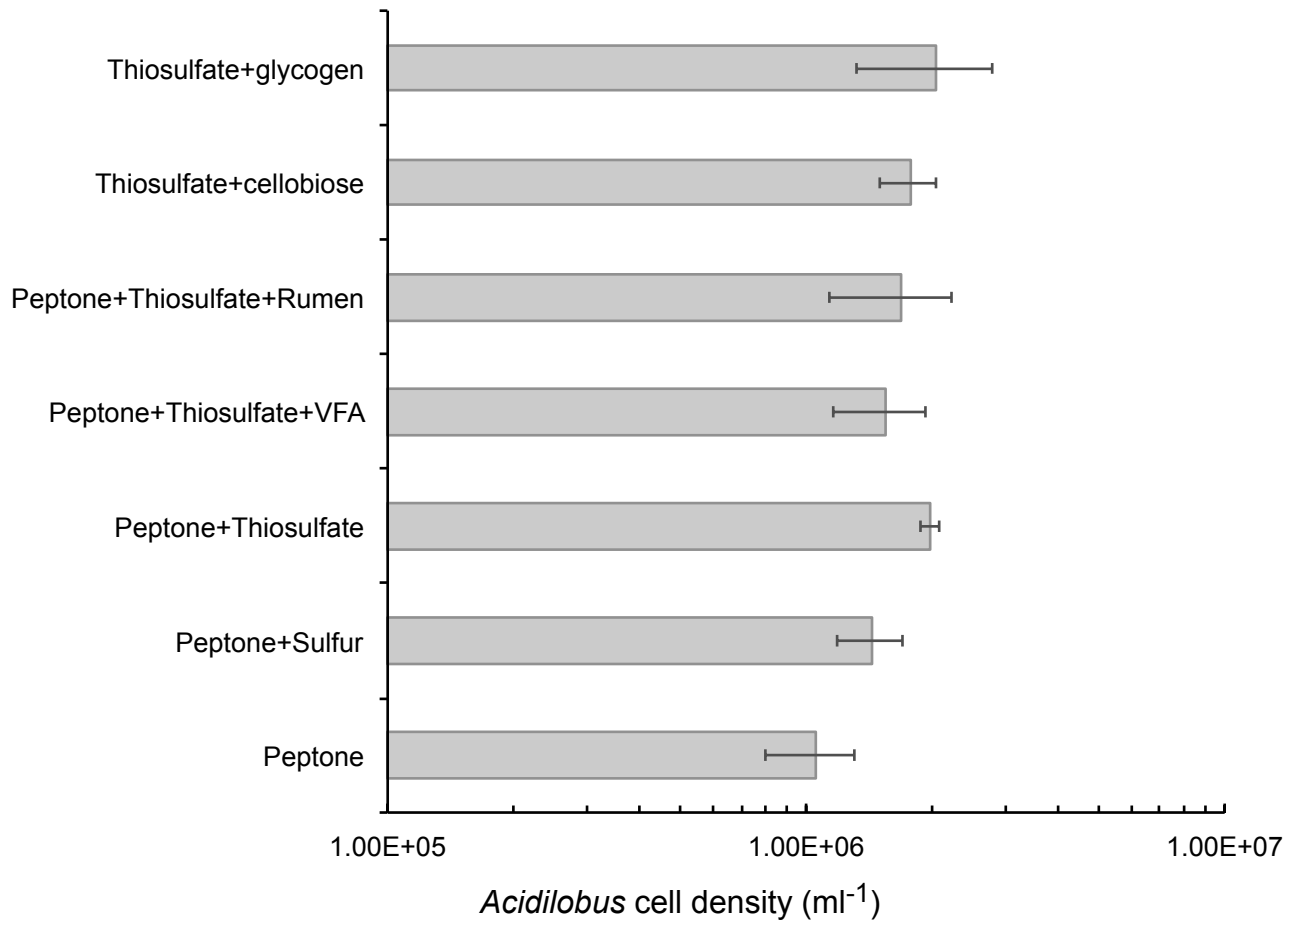

**Supplementary Figure 2.** Effect of variations in media composition on *Acidilobus* growth in co-culture with *N. acidilobi*, based on cell density measured after 3 days. Scale bars correspond to standard deviation based on 3 replicate cultures.

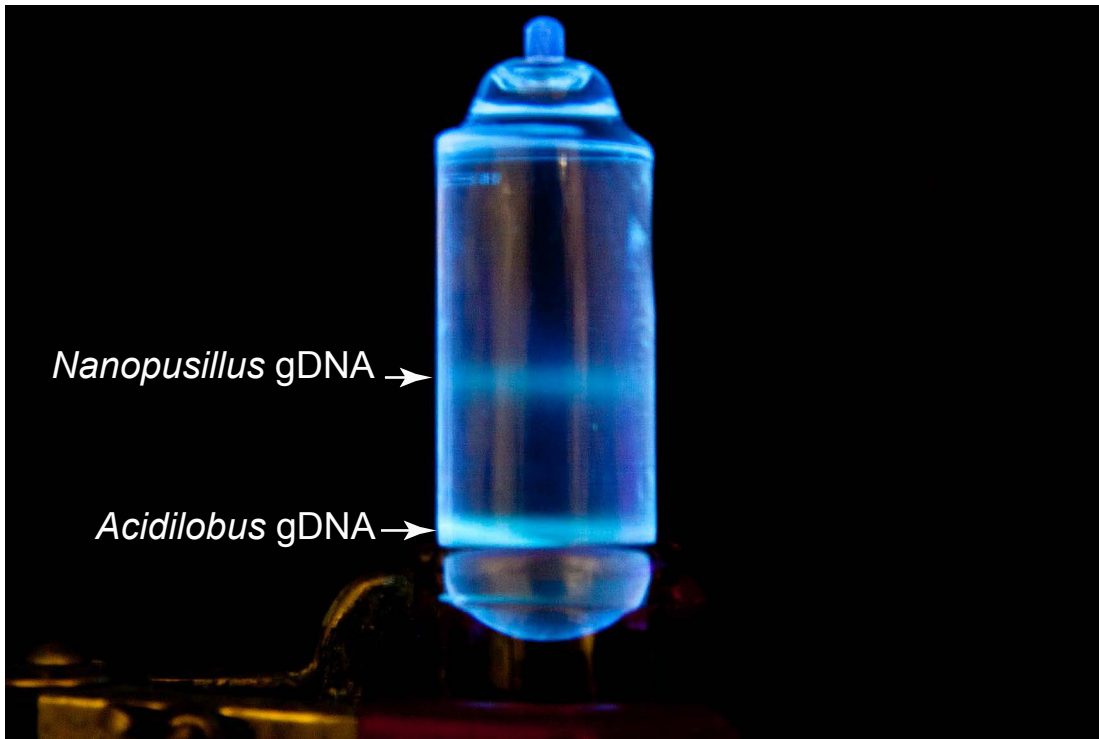

**Supplementary Figure 3.** Separation of *Acidilobus* and *Nanopusillus* gDNA based on equilibrium density ultracentrifugation in bisbenzimidazole-CsCl gradient

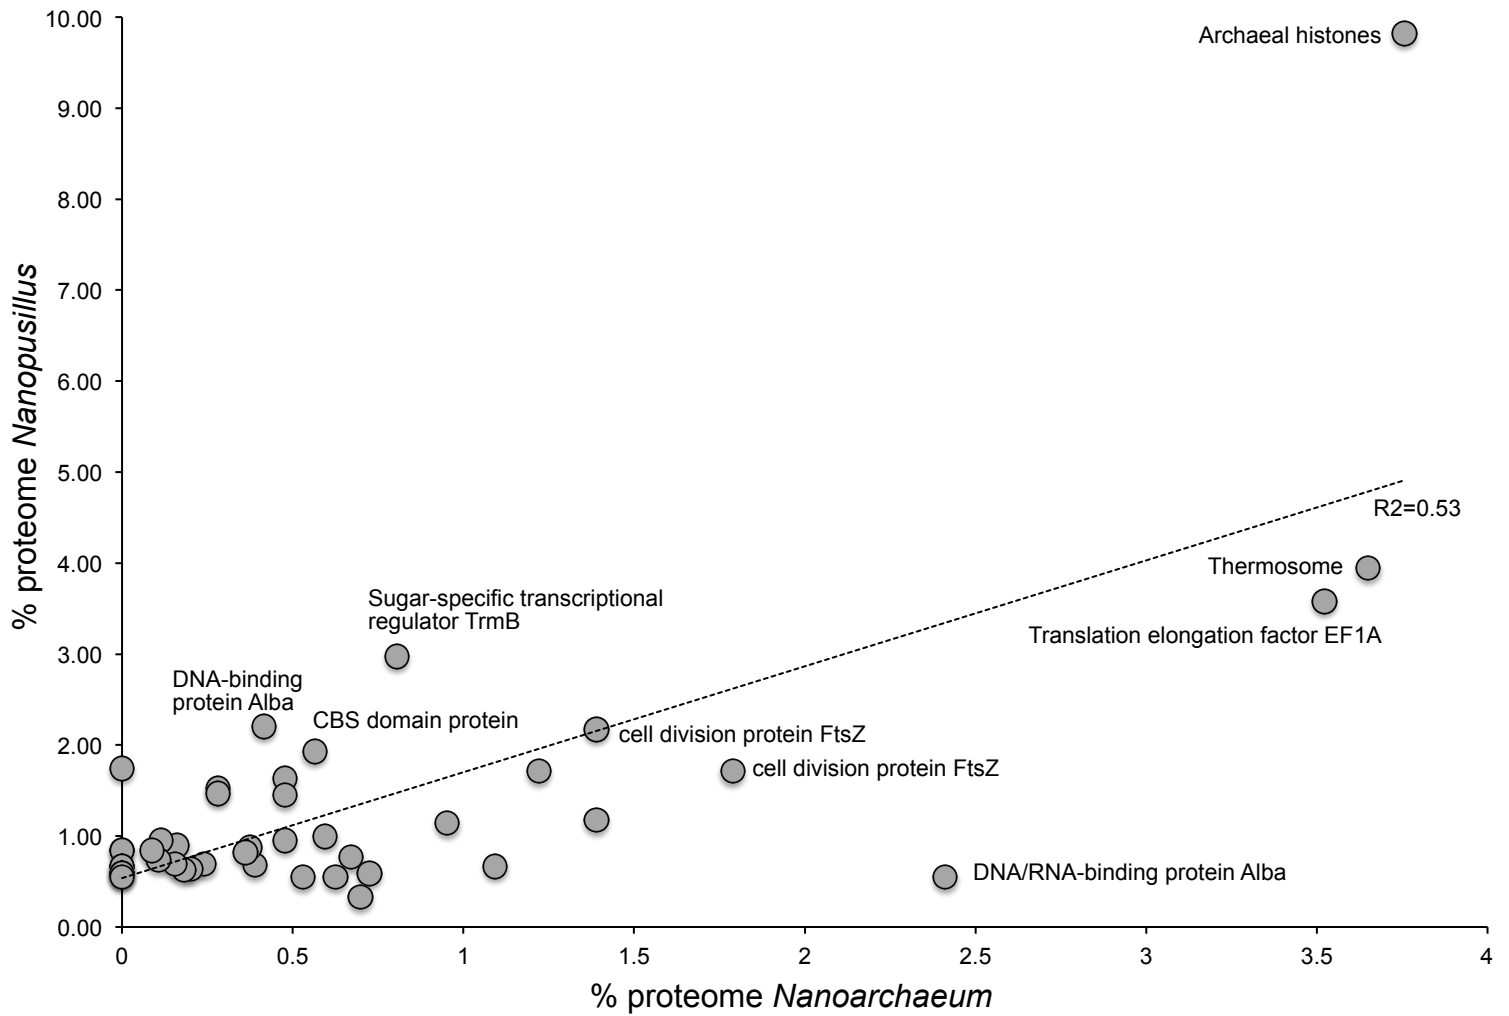

**Supplementary Figure 4.** Comparison of the top 50 relative most abundant proteins in *Nanopusillus acidilobi* versus *Nanoarchaeum equitans* (data from Giannone et al, 2011). The proteins indicated as 0% on the *Nanoarchaeum* axis are not encoded in the genome.

*Acidilobus* sp.7A CIS

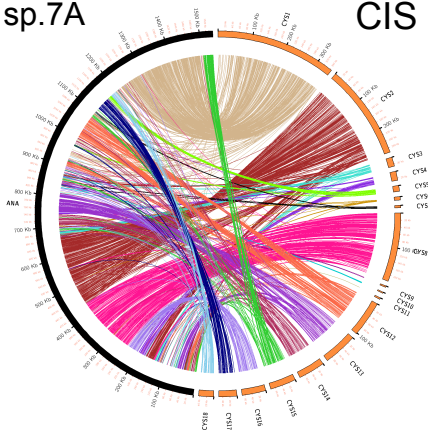

*Acidilobus* sp.7A JCHS

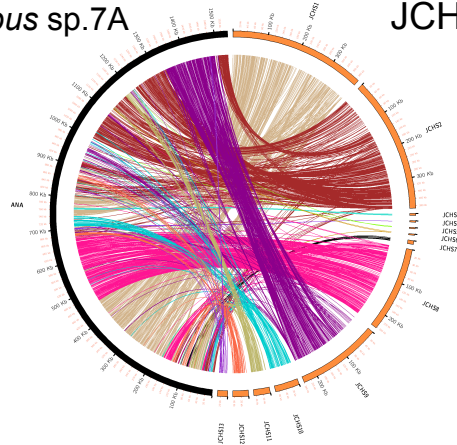

*Acidilobus* sp.7A OSP

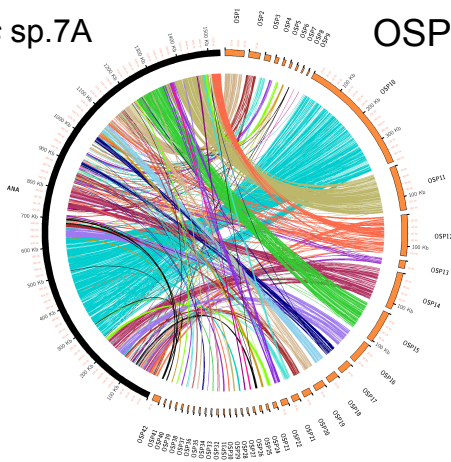

*Acidilobus* sp.7A MG

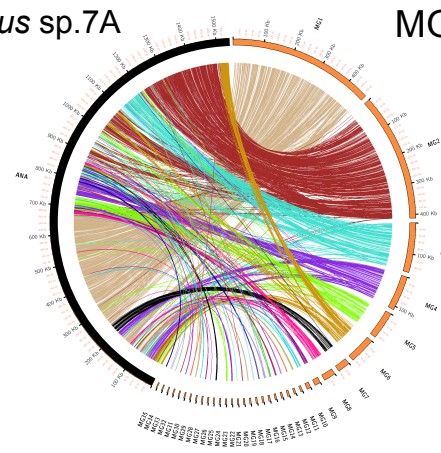

**Supplementary Figure 5.** Circos-based genome alignments between *Acidilobus* sp.7A and *Acidilobus*-like populations from Yellowstone (Jay et al 2014)

|                                                | <b>N. equitans</b>           | <b>Nst1</b>       | <b>N. acidilobi</b> | <b>Note</b>                  |
|------------------------------------------------|------------------------------|-------------------|---------------------|------------------------------|
| <b>Size</b>                                    | 491kb                        | 593kb (7 contigs) | 606 kb              |                              |
| <b>G+C %</b>                                   | 31.6%                        | 24.3%             | 24.3%               |                              |
| <b>Split Proteins</b>                          |                              |                   |                     |                              |
| Reverse gyrase                                 | NEQ 318-434                  | Nst 337-402       | Nps 2030-2705       | Same site                    |
| Glu-tRNA <sup>Gln</sup> amidotransferase       | NEQ 245-396                  | Nst 197-449       | Nps 2280-3415       | Same site                    |
| Predicted RNA-binding protein                  | NEQ 438-506                  | Nst 176-251       | Nps 30-3140         | Same site                    |
| Archaeosine tRNA-guanine transglycosylase      | NEQ 124-305                  | Nst 096-232       | Nps 1135-3235       | Same site                    |
| RNA polymerase subunit B                       | NEQ 156-173                  | Nst 632-633       | Nps 545-550         | Same site                    |
| Large helicase-related protein                 | NEQ 003-409                  | Nst 172-239       | Nps 745-3195        | Different site               |
| DNA polymerase I                               | NEQ 068-528                  | Nst 417           | Nps 2105            | Not split in <i>Nst1-Nac</i> |
| Topoisomerase I                                | NEQ 045-324                  | Nst 174           | Nps 45              | Not split in <i>Nst1-Nac</i> |
| P-loop ATPase-acetyltransferase fusion protein | NEQ 096-495                  | Nst 401           | Nps 2025            | Not split in <i>Nst1-Nac</i> |
| Alanyl-tRNA synthetase                         | NEQ 211-547                  | Nst 054           | Nps 290             | Not split in <i>Nst1-Nac</i> |
| Diphthamide synthase sub. DPH2                 | -                            | Nst 222-440       | Nps 3285-2235       | Absent in <i>N.eq.</i>       |
| Uncharacterized conserved protein (arCOG04253) | -                            | Nst 474-480       | Nps 2410            | Absent in <i>N.eq.</i>       |
| <b>tRNAs</b>                                   |                              |                   |                     |                              |
| <i>cis</i> -spliced tRNAs                      | Ile, Met, Trp, Tyr           | Ile, Tyr          | Ile, Tyr            |                              |
| <i>trans</i> -joined tRNAs                     | iMet, His, Lys, Gln, Glu (2) | none              | none                |                              |
| RNase P                                        | Absent                       | Present           | Present             |                              |
| Gluconeogenesis-Glycolysis                     | Absent                       | Present           | Present             |                              |
| Polyamine biosynthesis                         | Absent                       | Present           | Present             |                              |
| ATP synthase                                   | Incomplete                   | Absent            | Absent              |                              |
| Glutamate dehydrogenase                        | Present                      | Absent            | Absent              |                              |

Supplementary Table 1. Comparison of genomic features (split genes and metabolic features) among sequenced Nanoarchaeota.

## **Supplementary References**

Giannone, R. J. et al. Life on the edge: functional genomic response of *Ignicoccus hospitalis* to the presence of *Nanoarchaeum equitans*. *ISME J* 9, 101-114 (2015).

Jay, Z. J. et al. Predominant *Acidilobus*-Like Populations from Geothermal Environments in Yellowstone National Park Exhibit Similar Metabolic Potential in Different Hypoxic Microbial Communities. *Appl. Env. Microbiol.* 80, 294-305 (2014).
